# Supplementary material for: Highly regio- and stereoselective four-component iodoamination of Se-substituted allenes. an efficient synthesis of N-(3-organoseleno-2-iodo-2(Z)-propenyl) acetamidesElectronic supplementary information (ESI) available: experimental section. See http://www.rsc.org/suppdata/cc/b3/b300879g/
Source: Royal Society of Chemistry journal article supplement (doi:10.1039/b300879g), 2003-04-02
Supplement: b300879g.doc [file b300879g.doc]

**Highly Regio- and Stereoselective Four-Component Iodoamination of Se-Substituted Allenes. An Efficient Synthesis of Stereodefined 3-Organoselenium-2-iodo-2-propenols and *N*-(3-Organoseleno-2-iodo-2(Z)-propenyl)acetamides**

**Shengming Ma,*†***a,b***Xueshi Hao,*b*** **and Xian Huang *b***

*a* Department of Chemistry, Zhejiang University, Hangzhou 310028, P. R. China

*b* State Key Laboratory of Organometallic Chemistry, Shanghai Institute of Organic Chemistry,

Chinese Academy of Sciences, 354 Fenglin Lu, Shanghai 200032, P. R. China

Fax: (+86)21-64166128; E-mail: [masm@pub.sioc.ac.cn](mailto:masm@pub.sioc.ac.cn)

**Supporting Information**

# Experimental section

*Z***-2-Iodo-3-phenylseleno-2-propen-1-ol** (*Z***-2a**): 1H NMR (300 MHz, CDCl3) δ7.57-7.60 (m, 2 H), 7.43 (t, *J* = 1.2 Hz, 1 H), 7.31-7.34 (m, 3 H), 4.21 (d, *J* = 4.8 Hz, 2 H), 2.66 (t, *J* = 4.8 Hz, 1 H); 13C NMR (75 MHz, CDCl3) δ133.56, 133.08, 129.44, 129.17, 128.15, 104.79, 71.73; IR (KBr) (cm-1) = 3349, 1577, 1477, 1438, 1070, 1021, 999, 789, 739, 690; MS(70 eV, EI) m/z(%): 340 (M+, 86.43), 157 (100); HRMS(EI) Calcd for C9H9IOSe: 339.88633; Found: 339.88904.

**N-(2-Iodo-3-phenylseleno-2(***Z***)-propenyl) acetamide** (*Z*-**3a**): solid, m.p. 100-102oC (CH2Cl2/*n*-hexane); 1H NMR (300 MHz, CDCl3) δ7.56-7.59 (m, 2 H), 7.26-7.37 (m, 4 H), 5.75 (bs, 1 H), 4.14 (d, *J* = 6.0 Hz, 2 H), 2.02 (s, 3 H); 13C NMR (75 MHz, CDCl3) δ170.16, 134.31, 133.48, 129.58, 129.29, 128.23, 101.53, 51.75, 23.26; IR (KBr) (cm-1) = 3269, 1632, 1545, 1434, 1282, 1194, 1023, 745, 736, 692; MS(70 eV, EI) m/z (%): 254 (M+-I, 88.05), 97 (100); Elemental Analysis Calcd for C11H12INOSe: C 34.77, H 3.18, N 3.69, I 33.39; Found: C 34.96, H 3.38, N 3.66, I 33.54.

**N-(2-Iodo-3-phenylseleno-2(***Z***)-propenyl) butyramide** (*Z*-**3b**): oil, 1H NMR (300 MHz, CDCl3) δ7.47-7.53 (m, 2 H), 7.21-7.29 (m, 4 H), 6.0 (bs, 1 H), 4.08 (d, *J* = 6.0 Hz, 2 H), 2.12 (t, *J* = 7.5 Hz, 2 H), 1.54-1.66 (m, 2 H), 0.87 (t, *J* = 7.5 Hz, 3 H); 13C NMR(75 MHz, CDCl3) δ172.65, 134.35, 133.42, 129.43, 129.14, 128.12, 101.37, 51.38, 38.47, 19.06, 13.77; IR (KBr)  = 3283, 3059, 2962, 2930, 2872, 1651, 1542, 1478, 1022, 738; MS(70 eV, EI) m/z (%): 409 (M+, 2.04), 282 (M+-I, 38.68), 43 (100); Elemental Analysis Calcd for C13H16INOSe : C 38.26, H 3.95, N 3.43; Found: C 38.63, H 3.93, N 3.32.

**N-(2-Iodo-3-(*p*-tolylseleno)-2(***Z***)-propenyl) acetamide** (*Z*-**3c**): solid, m.p. 125-127oC

(ethyl acetate /*n*-Hexane); 1H NMR (300 MHz, CDCl3) δ7.45-7.47 (d, *J* = 7.8 Hz, 2 H), 7.32(s, 1 H), 7.11-7.14 (d, *J* = 8.1 Hz, 2 H), 5.88(s, 1 H), 4.12 (d, *J* = 6.0 Hz, 2 H), 2.34(s, 3 H) ,2.01 (s, 3 H); 13C NMR(75 MHz, CDCl3) δ170.11, 138.68, 135.52, 134.07, 130.56, 125.67, 100.91, 51.92, 23.54, 21.45; IR (KBr)  = 3282, 1637, 1540, 1490, 1438, 1189, 1026, 1016,810, 792, 734; MS(70 eV, EI) m/z (%): 396 (M++1, 9.08), 395 (M+, 2.06), 268 (M+-127, 100); Elemental Analysis Calcd for C12H14INOSe: C 36.58, H 3.58, N 3.55; Found: C 36.78, H 3.73, N 3.69.

**N-(2-Iodo-3-(*o*-tolylseleno)-2(***Z***)-propenyl) acetamide** (*Z*-**3d**): oil, 1H NMR (300 MHz, CDCl3) δ7.52 (d, *J* = 8.1 Hz, 1 H), 7.20-7.22 (m, 3 H), 7.10-7.13 (m, 1 H), 6.55 (bs, 1 H), 4.10 (d, *J* = 5.7 Hz, 2 H), 2.40 (s, 3 H), 1.98 (s, 3 H); 13C NMR (75 MHz, CDCl3) δ169.84, 140.11, 134.11, 133.57, 130.29 129.97, 128.42, 126.77, 101.75, 51.60, 23.06, 22.68; IR (KBr)  = 3277, 2925, 2854, 1655, 1547, 1468, 1372, 1283, 1035, 749; MS (70 eV, EI) m/z (%): 268 (M+-I, 86.34), 97 (100) Elemental Analysis Calcd for C12H14INOSe: C 34.77, H 3.58, N 3.55; Found: C 36.63, H 3.68, N 3.50.

**N-[3-(*p*-Bromophenylseleno)-2-iodo-2(***Z***)-propenyl] acetamide** (*Z*-**3e**): Solid, m.p. 116-117oC (ethyl acetate /*n*-Hexane); 1H NMR (300 MHz, CDCl3) δ7.26-7.46 (m, 4 H), 7.29 (s, 1 H), 6.01 (bs, 1 H), 4.12 (d, *J* = 6.0 Hz, 2 H), 2.01 (s, 3 H); 13C NMR(75 MHz, CDCl3) δ170.13, 135.27, 133.92, 132.86, 128.31, 122.89, 102.38, 51.91, 23.54; IR (KBr)  = 3273, 3064, 1650, 1546, 1469, 1284, 1074, 1004, 807, 800, 478; MS (70 eV, EI) m/z(%): 459 (M+(79Br), 0.59), 332 (M+(79Br)-I, 82.31), 97(100); Elemental Analysis Calcd for C11H11BrINOSe: C 28.79, H 2.42, N 3.05; Found: C 28.88, H 2.61, N 2.97.

**N-(3-(*p*-Chloro-phenylseleno)-2-iodo-2(***Z***)-propenyl) acetamide** (*Z*-**3f**): solid,

m.p. 114-116oC (ethyl acetate/*n*-Hexane); 1H NMR (300 MHz, CDCl3) δ7.48-7.51 (d, *J* = 8.1 Hz, 2 H), 7.25-7.31 (m, 3 H), 5.76 (bs, 1 H), 4.14 (d, *J* = 5.7 Hz, 2 H), 2.02 (s, 3 H); 13C NMR(75 MHz, CDCl3) δ170.18, 135.08, 134.79, 134.11, 129.93, 127.58, 102.20, 51.90, 23.53; IR(KBr)  = 3292, 1638, 1533, 1474, 1387, 1191, 1091, 1011, 820, 789, 736; MS(70 eV, EI) m/z (%):417 (M+(37Cl), 1.76), 415 (M+(35Cl), 3.91), 288 (M+(35Cl)-I, 89.13), 97 (100)**;** Elemental Analysis Calcd for C11H11ClINOSe: C 31.88, H 2.67, N 3.38; Found: C 31.94, H 2.77 , N 3.29.

**N-(2-Iodo-3-(*p*-methoxyphenylseleno)- 2(***Z***)-propenyl) acetamide** (*Z*-**3g**): solid,

m.p. 85-87oC(ethyl acetate/*n*-hexane); 1H NMR (300 MHz, CDCl3) δ7.46-7.49 (d, *J* = 8.1 Hz, 1 H), 7.24-7.25 (s, 2 H), 6.81-6.84 (d, *J* = 8.1 Hz, 2 H), 6.42 (bs, 1 H), 4.06 (d, *J* = 6.0 Hz, 2 H), 3.78 (s, 3 H), 1.98 (s, 3 H); 13C NMR(75 MHz,CDCl3) δ170.37, 160.16, 136.12, 135.75, 119.36, 115.35, 100.64, 55.64, 51.85, 23.50; IR (KBr)  = 3255, 1639, 1541, 1491, 1287, 1249, 1173, 1026, 828, 734; MS(70 eV, EI) m/z (%) : 411 (M+, 1.50), 284 (M+-I, 100); Elemental Analysis Calcd for C12H14INO2Se: C 35.15, H 3.44, N 3.42; Found: C 35.23, H 3.56 , N 3.28.

**N-Ethyl N-(2-iodo-3-phenylseleno-2(***Z***)-propenyl) amine**(*Z*-**8a**): oil, 1H NMR (300 MHz, CDCl3) δ7.52-7.56 (m, 2 H), 7.21-7.30 (m, 3 H), 7.20 (s, 1 H),3.41 (s, 2 H), 2.50 (q, *J* = 7.2 Hz 2 H), 1.06 (t, *J* = 7.2 Hz 3 H); 13C NMR (75 MHz, CDCl3) δ133.29, 132.07, 129.43, 129.28, 127.86, 108.33, 61.19, 41.52, 15.00; IR (KBr)  = 3313, 2964, 1579, 1477, 1438, 736, 690; MS(70 eV, EI) m/z (%): 367 (M+, 12.07), 240 (M+-I, 100); Elemental Analysis Calcd for C11H14INSe: C 36.09, H 3.85, N 3.83; Found: C 36.75, H 3.96, N 3.85.

**2-Methyl-5-(phenylselenomethyl)oxazole** (**9a**): oil, 1H NMR (300 MHz, CDCl3) δ7.45-7.48 (m, 2 H), 7.25-7.27 (m, 3 H), 6.53 (s, 1 H), 3.98 (s, 2 H), 2.39 (s, 1 H); 13C NMR (75 MHz,CDCl3) δ161.37, 148.97, 134.46, 134.39, 129.43, 129.40, 129.36, 128.14, 124.24, 20.64, 14.22; IR (KBr)  = 2928, 1572, 1478, 1438, 1220, 737, 692, 667, 466; MS (70eV, EI) m/z(%): 253 (M+, 57.18), Elemental Analysis Calcd for C11H11NOSe: C 52.41, H 4.40, N 5.56; Found: C 52.93, H 4.82, N 5.46.
